# Supplementary material for: Pathway Relevance Ranking for Tumor Samples through Network-Based Data Integration
Source: PubMed Central journal article supplement (PMC4517887; doi:10.1371/journal.pone.0133503), 2015-07-28
Supplement: pone.0133503.s020.pdf [file pone.0133503.s020.pdf]

| IDs  | Names                                                    | Score |      | Rank |     |
|------|----------------------------------------------------------|-------|------|------|-----|
|      |                                                          | SIM   | FRQ  | SIM  | FRQ |
| 4151 | PI3K-Akt signaling pathway                               | 8.59  | 8.31 | 1    | 1   |
| 4630 | Jak-STAT signaling pathway                               | 8.31  | 5.41 | 2    | 5   |
| 4152 | AMPK signaling pathway                                   | 8.22  | 7.57 | 3    | 2   |
| 4350 | TGF-beta signaling pathway                               | 7.39  | 5.38 | 4    | 6   |
| 4012 | ErbB signaling pathway                                   | 7.26  | 5.04 | 5    | 12  |
| 4550 | Signaling pathways regulating pluripotency of stem cells | 7.12  | 5.20 | 6    | 10  |
| 4921 | Oxytocin signaling pathway                               | 7.08  | 5.36 | 7    | 7   |
| 4510 | Focal adhesion                                           | 7.05  | 7.00 | 8    | 3   |
| 4915 | Estrogen signaling pathway                               | 6.80  | 4.13 | 9    | 30  |
| 4917 | Prolactin signaling pathway                              | 6.68  | 4.14 | 10   | 29  |
| 4062 | Chemokine signaling pathway                              | 6.48  | 4.38 | 11   | 21  |
| 4024 | cAMP signaling pathway                                   | 6.38  | 4.13 | 12   | 31  |
| 4014 | Ras signaling pathway                                    | 6.30  | 4.10 | 13   | 33  |
| 4010 | MAPK signaling pathway                                   | 6.09  | 3.87 | 14   | 38  |
| 4022 | cGMP-PKG signaling pathway                               | 5.96  | 4.43 | 15   | 20  |
| 4722 | Neurotrophin signaling pathway                           | 5.95  | 5.07 | 16   | 11  |
| 4930 | Type II diabetes mellitus                                | 5.87  | 4.92 | 17   | 13  |
| 4932 | Non-alcoholic fatty liver disease (NAFLD)                | 5.83  | 4.85 | 18   | 15  |
| 4060 | Cytokine-cytokine receptor interaction                   | 5.77  | 5.64 | 19   | 4   |
| 4725 | Cholinergic synapse                                      | 5.76  | 3.15 | 20   | 58  |
| 4919 | Thyroid hormone signaling pathway                        | 5.73  | 4.36 | 21   | 22  |
| 4015 | Rap1 signaling pathway                                   | 5.73  | 4.31 | 22   | 24  |
| 4620 | Toll-like receptor signaling pathway                     | 5.56  | 4.01 | 23   | 35  |
| 4310 | Wnt signaling pathway                                    | 5.53  | 3.22 | 24   | 55  |
| 4110 | Cell cycle                                               | 5.42  | 3.32 | 25   | 54  |
| 4662 | B cell receptor signaling pathway                        | 5.34  | 4.46 | 26   | 19  |
| 4066 | HIF-1 signaling pathway                                  | 5.32  | 3.94 | 27   | 37  |
| 830  | Retinol metabolism                                       | 5.30  | 5.36 | 28   | 9   |
| 4150 | mTOR signaling pathway                                   | 5.10  | 4.60 | 29   | 18  |
| 4611 | Platelet activation                                      | 5.03  | 3.55 | 30   | 46  |
| 4920 | Adipocytokine signaling pathway                          | 5.01  | 4.65 | 31   | 17  |
| 3320 | PPAR signaling pathway                                   | 4.95  | 4.77 | 32   | 16  |
| 4666 | Fc gamma R-mediated phagocytosis                         | 4.92  | 4.21 | 33   | 27  |
| 982  | Drug metabolism - cytochrome P450                        | 4.81  | 4.90 | 34   | 14  |
| 4390 | Hippo signaling pathway                                  | 4.78  | 4.11 | 35   | 32  |
| 4610 | Complement and coagulation cascades                      | 4.70  | 5.36 | 36   | 8   |
| 4910 | Insulin signaling pathway                                | 4.67  | 3.67 | 37   | 42  |
| 350  | Tyrosine metabolism                                      | 4.61  | 4.27 | 38   | 26  |
| 4660 | T cell receptor signaling pathway                        | 4.60  | 3.47 | 39   | 50  |
| 4261 | Adrenergic signaling in cardiomyocytes                   | 4.58  | 3.48 | 40   | 49  |
| 4916 | Melanogenesis                                            | 4.57  | 2.73 | 41   | 70  |
| 4068 | FoxO signaling pathway                                   | 4.54  | 3.62 | 42   | 44  |
| 4668 | TNF signaling pathway                                    | 4.52  | 3.83 | 43   | 40  |
| 140  | Steroid hormone biosynthesis                             | 4.51  | 4.17 | 44   | 28  |
| 983  | Drug metabolism - other enzymes                          | 4.49  | 3.87 | 45   | 39  |
| 4380 | Osteoclast differentiation                               | 4.44  | 3.62 | 46   | 45  |
| 4512 | ECM-receptor interaction                                 | 4.35  | 4.33 | 47   | 23  |
| 4750 | Inflammatory mediator regulation of TRP channels         | 4.29  | 3.15 | 48   | 59  |
| 40   | Pentose and glucuronate interconversions                 | 4.26  | 3.96 | 49   | 36  |
| 4210 | Apoptosis                                                | 4.24  | 4.27 | 50   | 25  |
